# Supplementary material for: AlphaFold2: A Role for Disordered Protein/Region Prediction?
Source: MDPI journal article supplement (doi:10.3390/ijms23094591), 2022-04-21
Supplement: s1 [file s1]

# Supplementary Information: AlphaFold2: A Role for Disordered Protein/Region Prediction?

Carter J. Wilson,<sup>†,‡</sup> Wing-Yiu Choy,<sup>\*,¶</sup> and Mikko Karttunen<sup>\*,§,||,‡</sup>

<sup>†</sup>*Department of Mathematics, The University of Western Ontario, 1151 Richmond Street, Canada, N6A 5B7*

<sup>‡</sup>*Centre for Advanced Materials and Biomaterials Research, The University of Western Ontario, 1151 Richmond Street, London, Ontario, Canada, N6A 5B7*

<sup>¶</sup>*Department of Biochemistry, The University of Western Ontario, 1151 Richmond Street, Canada, N6A 5C1*

<sup>§</sup>*Department of Chemistry, The University of Western Ontario, 1151 Richmond Street, Canada, N6A 3K7*

<sup>||</sup>*Department of Physics and Astronomy, The University of Western Ontario, 1151 Richmond Street, Canada, N6A 5B7*

E-mail: jchoy4@uwo.ca; mkarttu@uwo.ca

# Supplemental Methods

## Dataset generation

$$P = \begin{bmatrix} A & M & K & L & A & T & E & T & G & E & A & H & L & K & A & M \\ - & - & 1 & 1 & 1 & 1 & 1 & - & - & - & - & - & - & - & - & - \\ - & - & - & - & - & - & S & S & S & S & S & S & S & - & - & - \\ 0 & 0 & 1 & 1 & 1 & 1 & 1 & 0 & 0 & 0 & 0 & 0 & 0 & 0 & 0 & 0 \\ - & - & 1 & 1 & 1 & 1 & 1 & 0 & 0 & 0 & 0 & 0 & 0 & - & - & - \end{bmatrix}$$

$P$  represents a single protein and some of the data used in the analysis. The first row is the amino acid sequence, the second row is the DisProt annotation (i.e. 1 = disordered, 0 = ordered, - = no data), the third row is the PDB annotation (i.e. - = no structural data present, S = structural data present), the fourth row is the DisProt dataset entry for this protein, the fifth row is the DisProt-PDB dataset entry for this protein. Note how residues with no DisProt data are assumed to be structured in the DisProt dataset entry while only residues for which either PDB or DisProt or both is available are included in the DisProt-PDB dataset entry. Also note that the residue 6 in the middle structured region is assigned to disorder in the DisProt-PDB, this is because disorder supercedes structure present in the PDB database.

## Statistical analysis methods

**True positive rate (TPR):** also called the sensitivity, this is the proportion of positive classifications that are actually positive, given by  $TPR = \left(\frac{TP}{TP+FN}\right)$ .

**True negative rate (TNR):** also called the specificity, this is the proportion of negative classifications that are actually negative, given by  $TNR = \left(\frac{TN}{TN+FP}\right)$ .

**False positive rate (FPR):** also called the fall-out, this is the proportion of positive clas-

sifications that are actually negative, given by  $FPR = 1 - TNR$ .

**False negative rate (FNR)**: also called the fall-out, this is the proportion of negative classifications that are actually positive, given by  $FNR = 1 - TPR$ .

Table M1: Confusion matrix (also known as error matrix or matching matrix depending on the context) for the disorder prediction problem. A given residue is experimentally classified as disordered or ordered, and the prediction can either classify a residue as disordered or ordered. This gives rise to four classification scenarios: true positive (TP), false positive (FP), false negative (FN) and true negative (TN).

|           |            | Experiment |         |
|-----------|------------|------------|---------|
|           |            | Disordered | Ordered |
| Predictor | Disordered | $TP$       | $FP$    |
|           | Ordered    | $FN$       | $TN$    |

**Reciever operating characteristic<sup>1</sup> (ROC)** and **precision-recall (PR)** are both methods for analyzing the data encoded in the confusion matrix (Table M1) allowing one to construct a point either in ROC or PR space. In ROC space, we plot the  $TPR$  vs  $FPR$ . Conversely, in PR space we plot the Precision vs Recall ( $TPR$ ) ( $\frac{TP}{TP+FP}$ ). We note that because the Recall and Precision equations lack true negatives PR curves can perform poorly if the underlying dataset is imbalanced with few negatives; the ROC curve is insensitive to class imbalance because it does account for these true negatives.

**Precision/Positive predictive value (PPV)**: the proportion of positive results that are actually true positives ( $\frac{TP}{TP+FP}$ ).

**Area under curve (AUC)**: the numerically integrated (trapezoidal) area under the ROC curve that provides an aggregate measure of performance across all possible classification thresholds.

**$F_{\max}$** : the maximum F1 score<sup>2</sup>, which is itself the harmonic mean of the precision and recall ( $2 \cdot \frac{\text{Precision} \cdot \text{Recall}}{\text{Precision} + \text{Recall}}$ ) and takes into account predictions across the entire sensitivity spec-

trum<sup>3</sup>.

**Balanced accuracy (BAC):** the average of the sensitivity ( $\frac{TP}{TP+FN}$ ) and specificity ( $\frac{TN}{FP+TN}$ ) that is particularly useful when the underlying classes are imbalanced.

**Matthews correlation coefficient<sup>4</sup> (MCC):** the Pearson product-moment correlation coefficient between the actual and predicted values. Given explicitly from the confusion matrix (Table M1) as

$$\text{MCC} = \frac{TP \times TN - FP \times FN}{\sqrt{(TP + FP)(TP + FN)(TN + FP)(TN + FN)}}.$$

Unlike the  $F_1$  score and the accuracy the MCC considers all four classes of the confusion matrix making it arguably a superior metric especially when dealing with unbalanced data<sup>5</sup>.

## Supplemental Figures and Tables



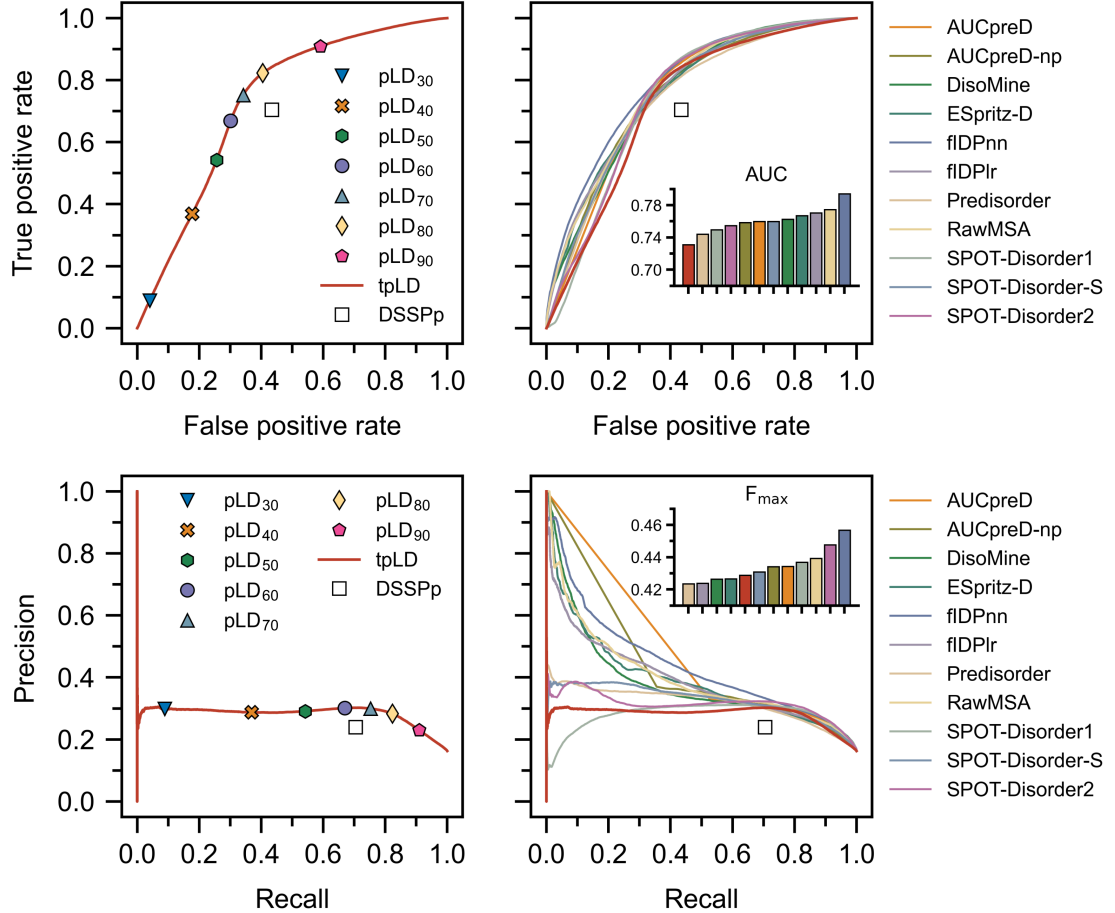

Figure S1: Receiver operating characteristic (ROC) curves (**top**) and precision-recall (**bottom**) are depicted for various predictors calculated per-residue on the DisProt dataset. Note that a ROC curve captures the probability of true and false positives at all thresholds, where an ideal predictor will have an area under the curve (AUC) equal to 1. Further note that a precision-recall curve, captures the trade-off between precision and recall; again, in the ideal case the harmonic mean of the precision and recall ( $F_{\max}$ ) will be equal to 1; bar colors correspond to the legend, red denotes tpLD. In all cases the tpLD (Equation (1) in main text) and various discrete pLD<sub>n</sub> predictors are indicated alongside DSSPp. pLDDT is abbreviated pLD for plotting purposes.

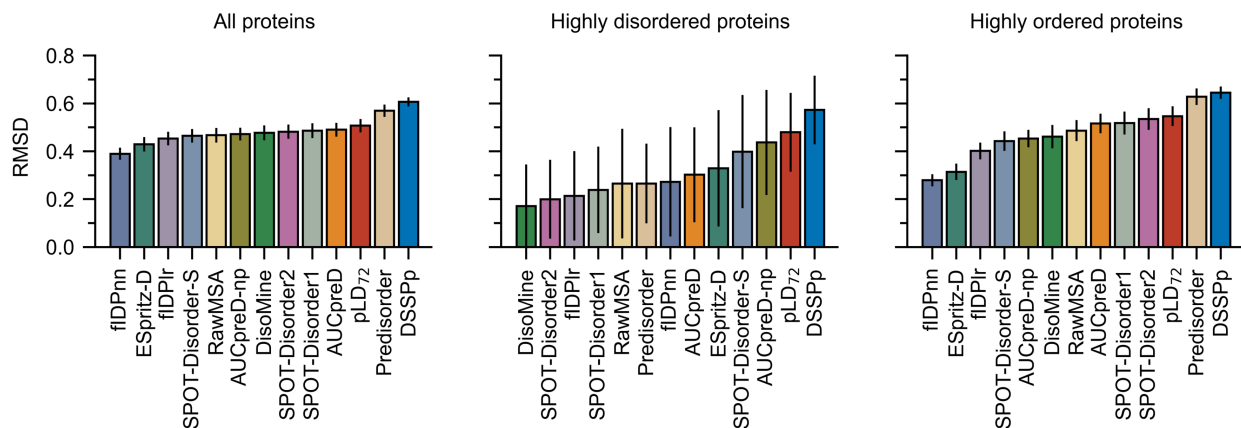

Figure S2: Average RMSD (Equation (2) in main text) values calculated for the DisProt dataset using various prediction methods calculated per-protein. Proteins were assigned to classes depending on disorder content (highly disordered i.e.  $> 90\%$  disorder and highly ordered i.e.  $< 10\%$  disorder). Bootstrapping, that is, sampling with replacement, was used to compute averages and estimate errors with 10,000 samples of size 60. pLD<sub>72</sub> resulted in much higher RMSD values than the sequence-based predictors. pLDDT is abbreviated pLD for plotting purposes.

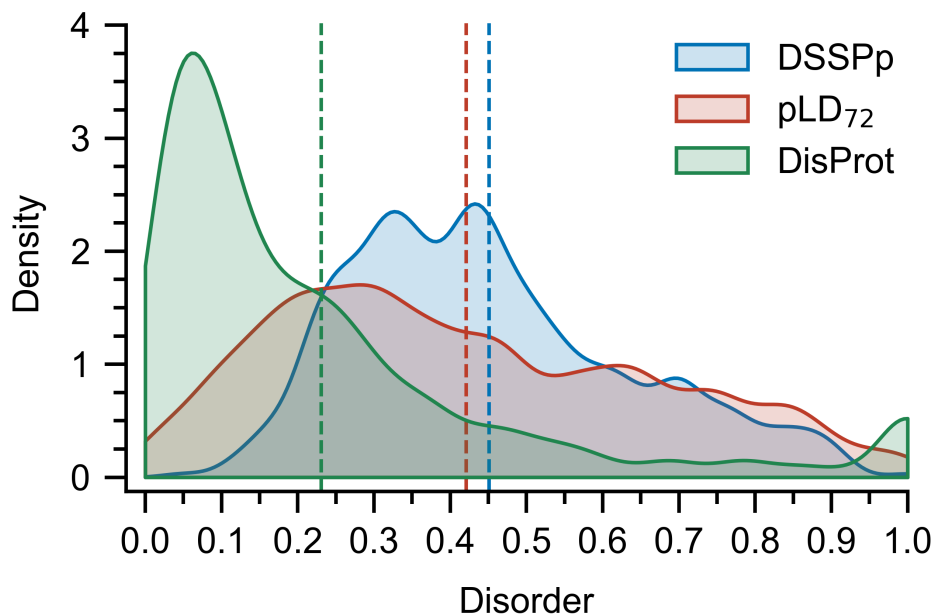

Figure S3: Distribution of disorder content per-protein in the DisProt-PDB and DisProt datasets depicted alongside the distributions predicted by pLD<sub>72</sub> and DSSPp. Bin-widths were set at 0.5 and bootstrapping, that is, sampling with replacement, was used to compute the distributions and average values (vertical dashed lines) with 10,000 samples of size 60. Poor agreement between DisProt and pLD<sub>72</sub> is evident. pLDDT is abbreviated pLD for plotting purposes.

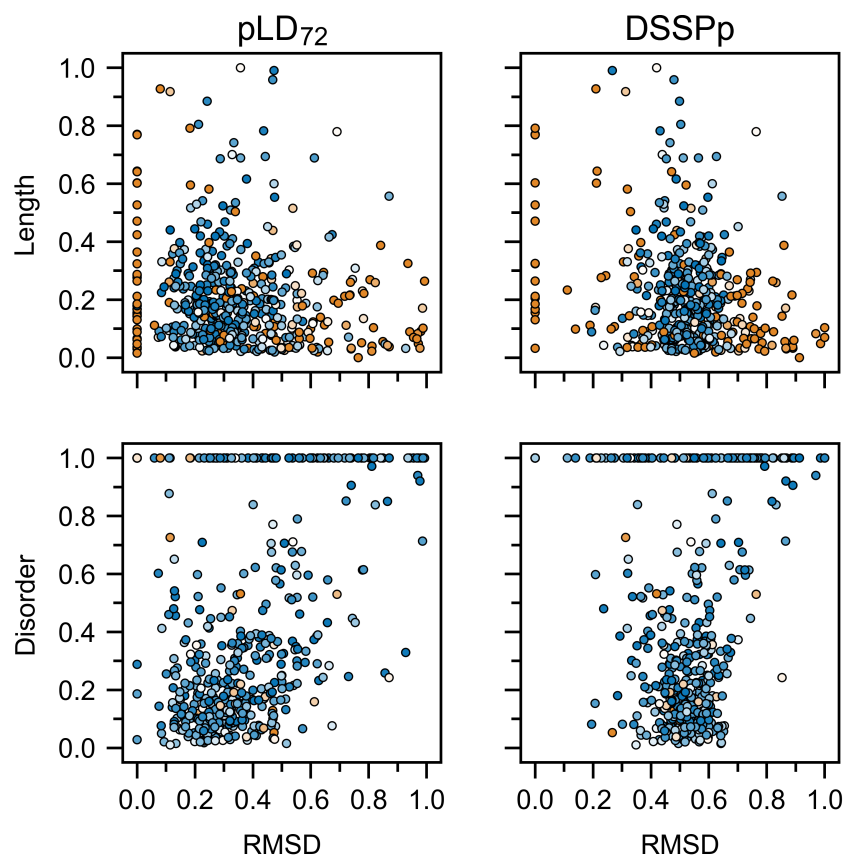

Figure S4: Relationship between protein length (scaled between 0 and 1) and RMSD and protein-wise disorder content and RMSD compared between pLD<sub>72</sub> and DSSPp on the DisProt-PDB dataset. Colors (0: blue, 0.5: white, 1: orange) indicate disorder content (upper plots) or length (scaled between 0 and 1) (lower plots). Each point represents a protein. pLDDT is abbreviated pLD for plotting purposes.

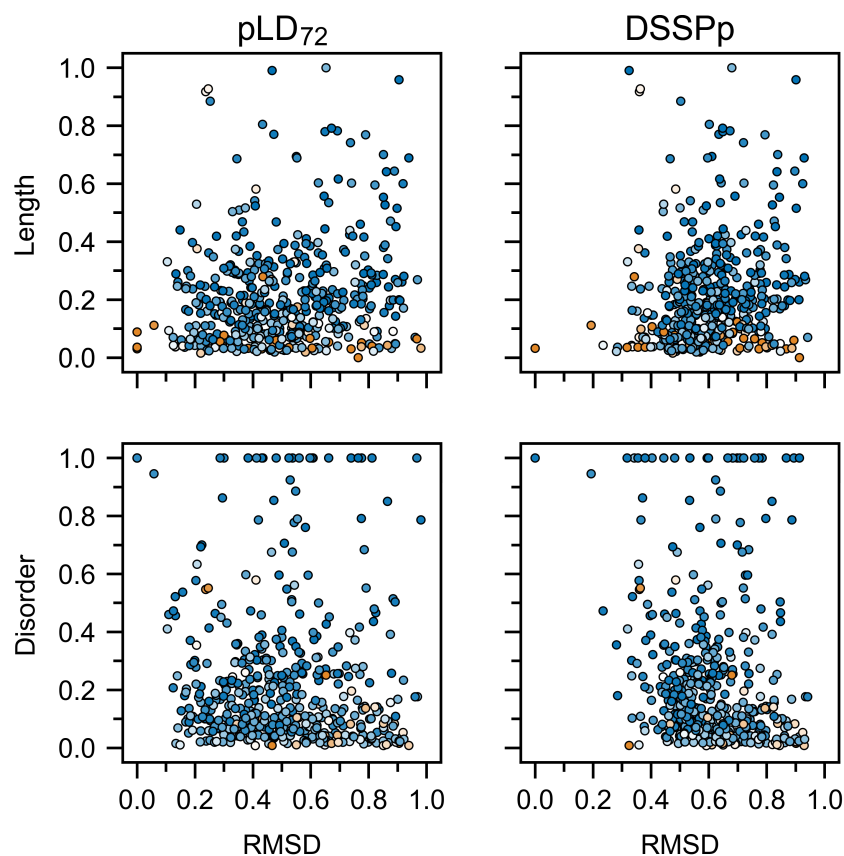

Figure S5: Relationship between protein length (scaled between 0 and 1) and RMSD, and protein-wise disorder content and RMSD compared between pLD<sub>72</sub> and DSSPp on the DisProt dataset. Colors (0: blue, 0.5: white, 1: orange) indicate disorder content (upper plots) or length (scaled between 0 and 1) (lower plots). Each point represents a protein. pLDDT is abbreviated pLD for plotting purposes.

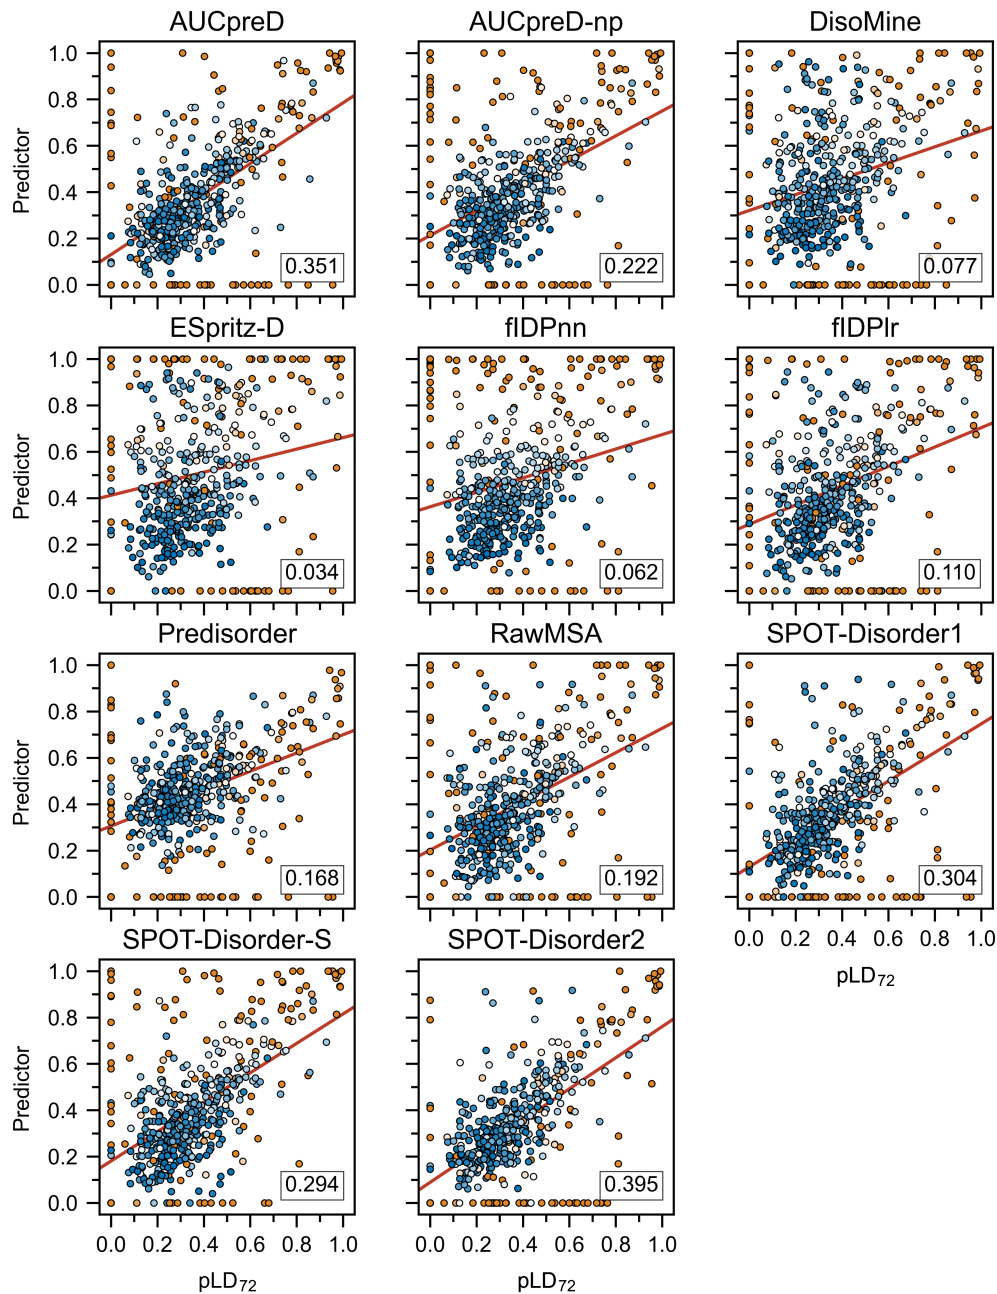

Figure S6: Correlation between conventional predictors and  $pLD_{72}$  for predicting protein-wise disorder RMSD on the DisProt-PDB dataset. Colors (0: blue, 0.5: white, 1: orange) indicate protein length (scaled between 0 and 1). Regression lines are colored red and the number in the bottom right is the  $r^2$ . Each point represents a protein. pLDDT is abbreviated pLD for plotting purposes.

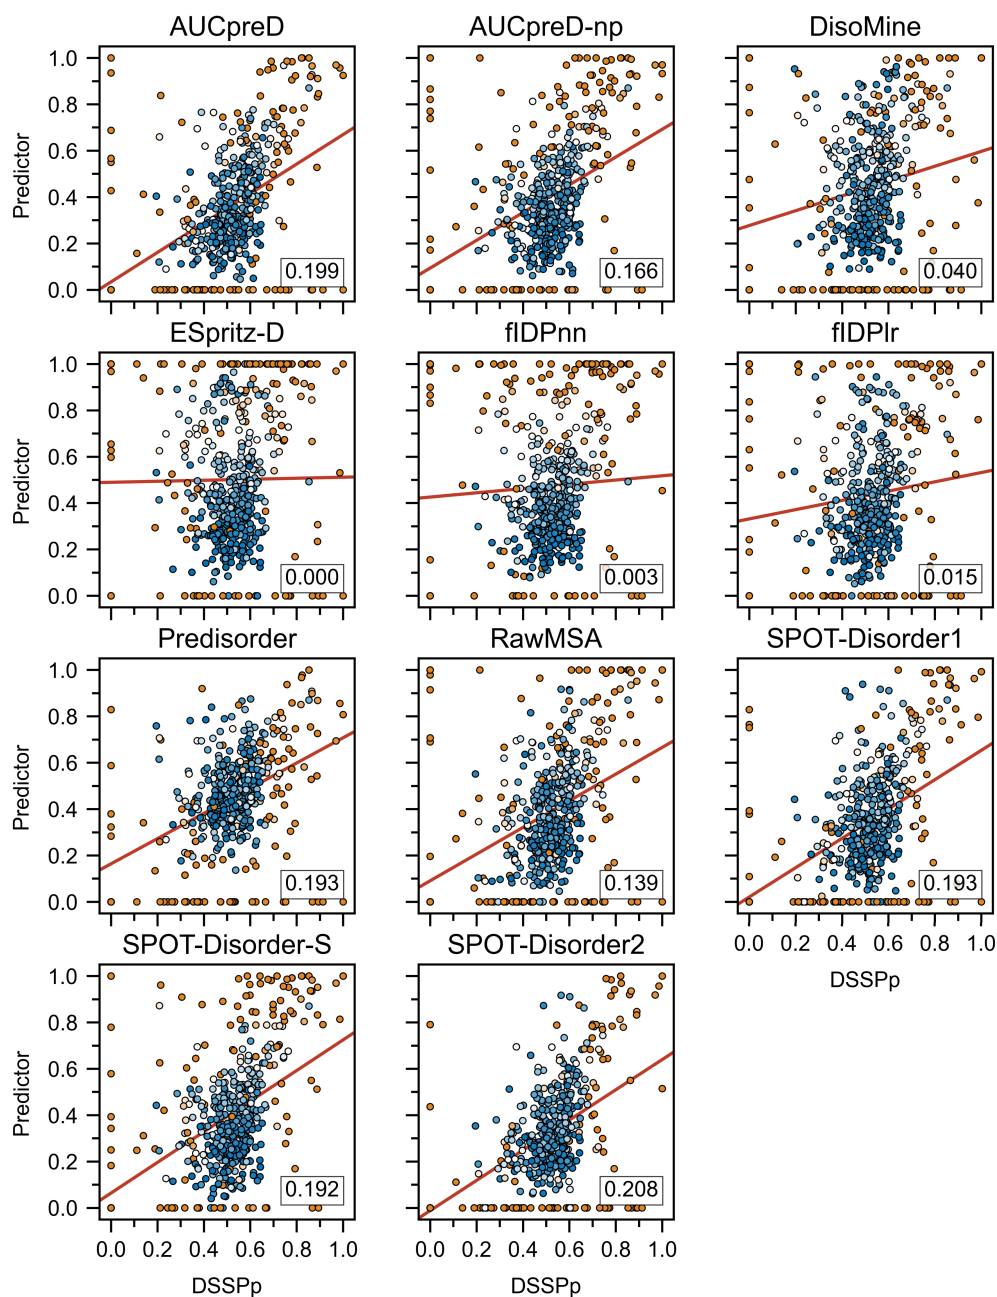

Figure S7: Correlation between conventional predictors and DSSPp for predicting protein-wise disorder RMSD on the DisProt-PDB dataset. Colors (0: blue, 0.5: white, 1: orange) indicate protein length (scaled between 0 and 1). Regression lines are colored red and the number in the bottom right is the  $r^2$ . Each point represents a protein.

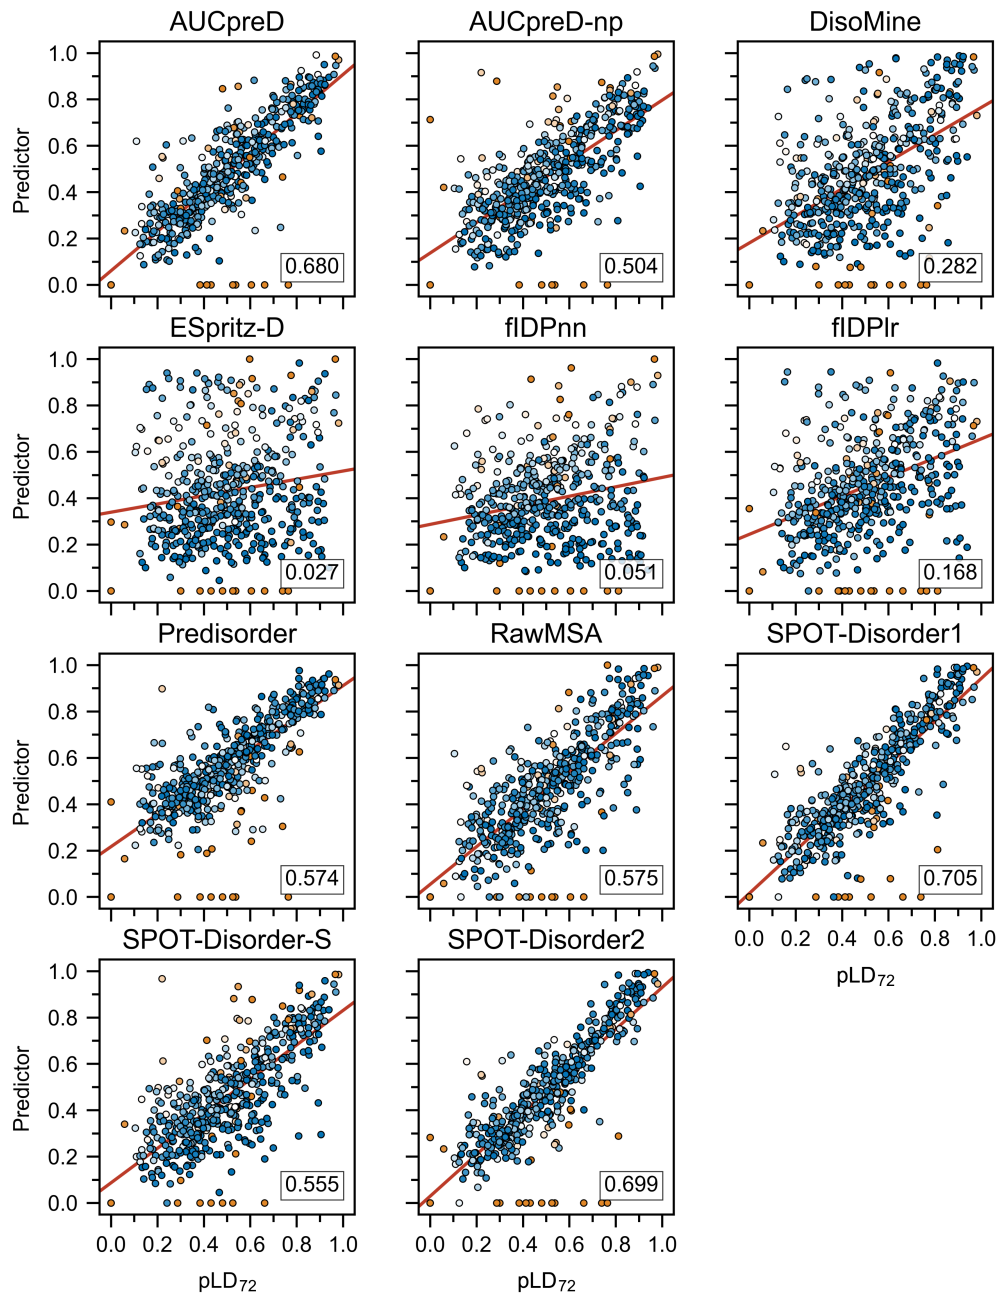

Figure S8: Correlation between conventional predictors and  $pLD_{72}$  for predicting protein-wise disorder RMSD on the DisProt dataset. Colors (0: blue, 0.5: white, 1: orange) indicate protein length (scaled between 0 and 1). Regression lines are colored red and the number in the bottom right is the  $r^2$ . Each point represents a protein.  $pLDDT$  is abbreviated  $pLD$  for plotting purposes.



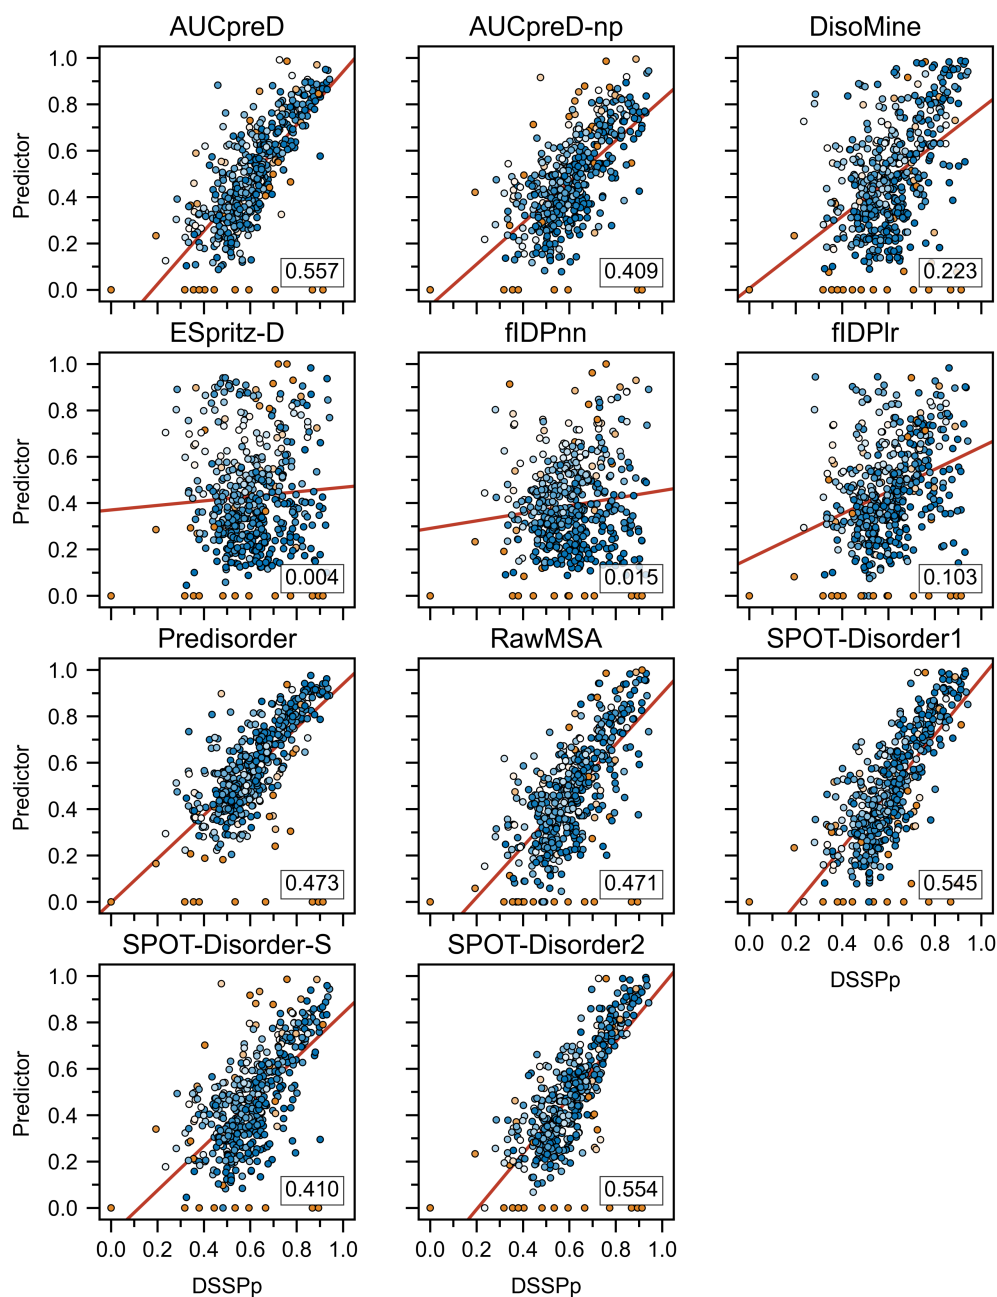

Figure S9: Correlation between conventional predictors and DSSPp for predicting protein-wise disorder RMSD on the DisProt dataset. Colors (0: blue, 0.5: white, 1: orange) indicate protein length (scaled between 0 and 1). Regression lines are colored red and the number in the bottom right is the  $r^2$ . Each point represents a protein.

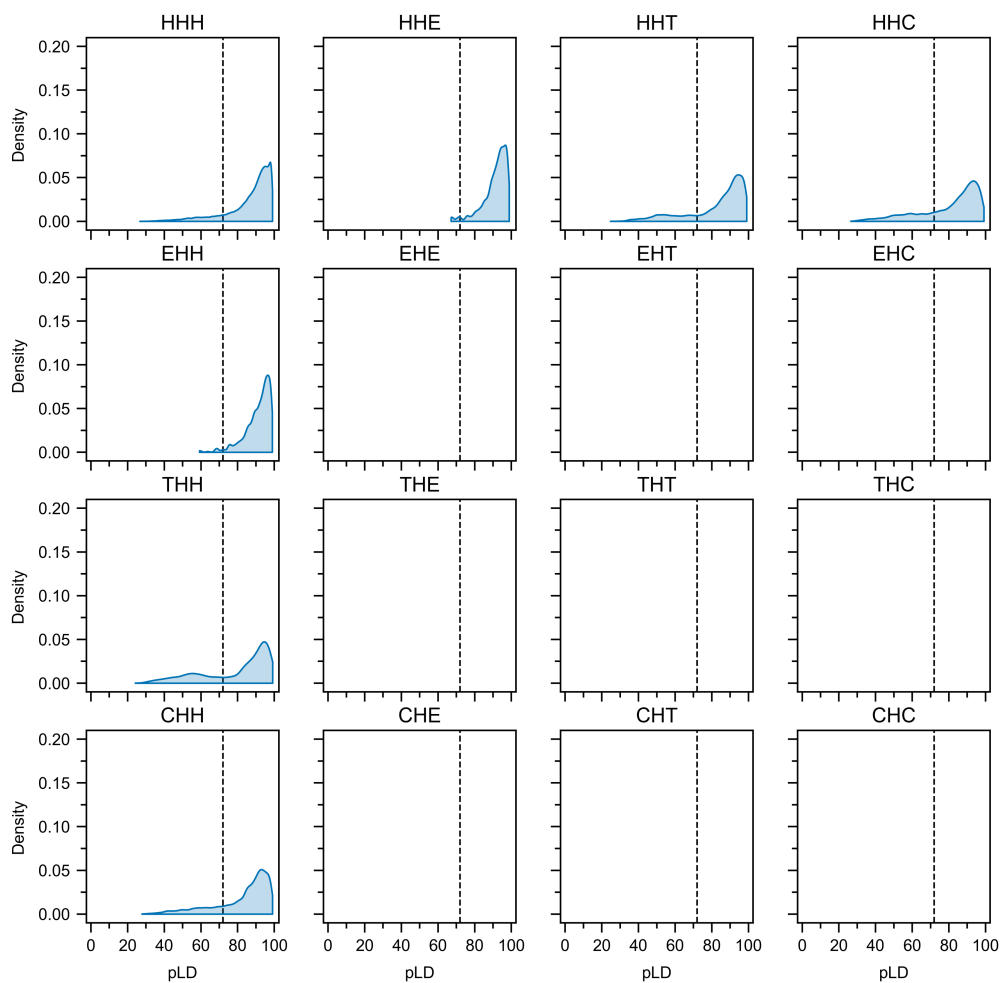

Figure S10: Distributions of pLD values for helical ( $\alpha$ -helix, 3<sub>10</sub>-helix and  $\pi$ -helix) secondary structure codons (SSC). Bin-widths were set at 0.5, vertical lines indicate pLD<sub>72</sub>. pLDDT is abbreviated pLD for plotting purposes.

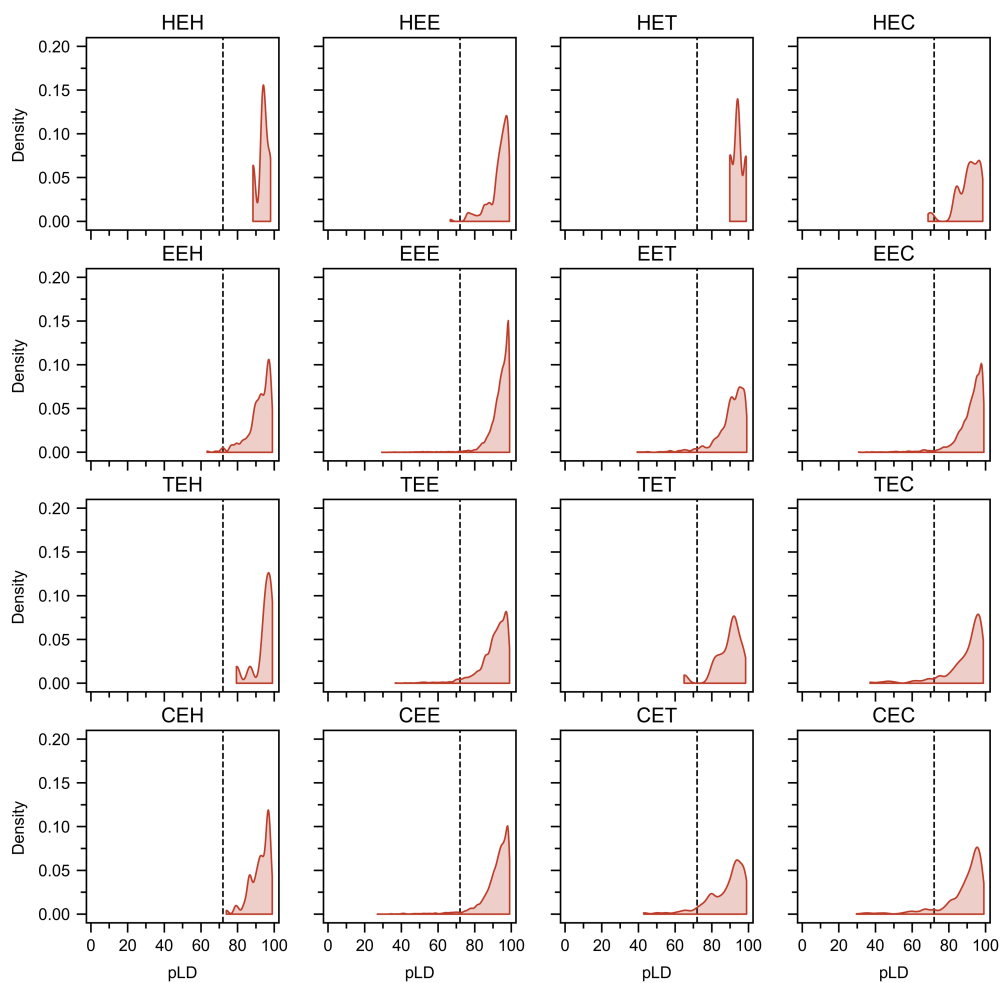

Figure S11: Distributions of pLD values for strand ( $\beta$ -strand and  $\beta$ -bridge) secondary structure codons (SSC). Bin-widths were set at 0.5, vertical lines indicate pLD<sub>72</sub>. pLDDT is abbreviated pLD for plotting purposes.

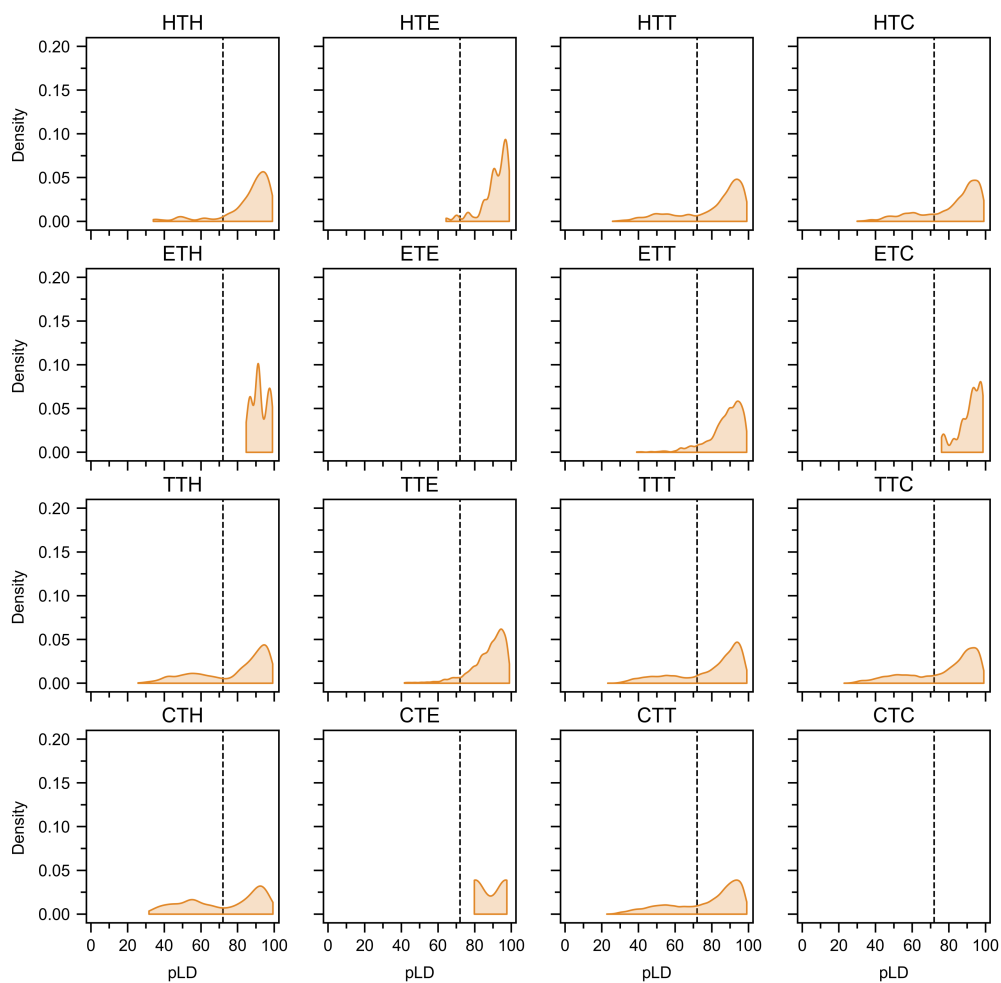

Figure S12: Distributions of pLD values for turn (H-bond stabilized turn) secondary structure codons (SSC). Bin-widths were set at 0.5, vertical lines indicate  $\text{pLD}_{72}$ . pLDDT is abbreviated pLD for plotting purposes.

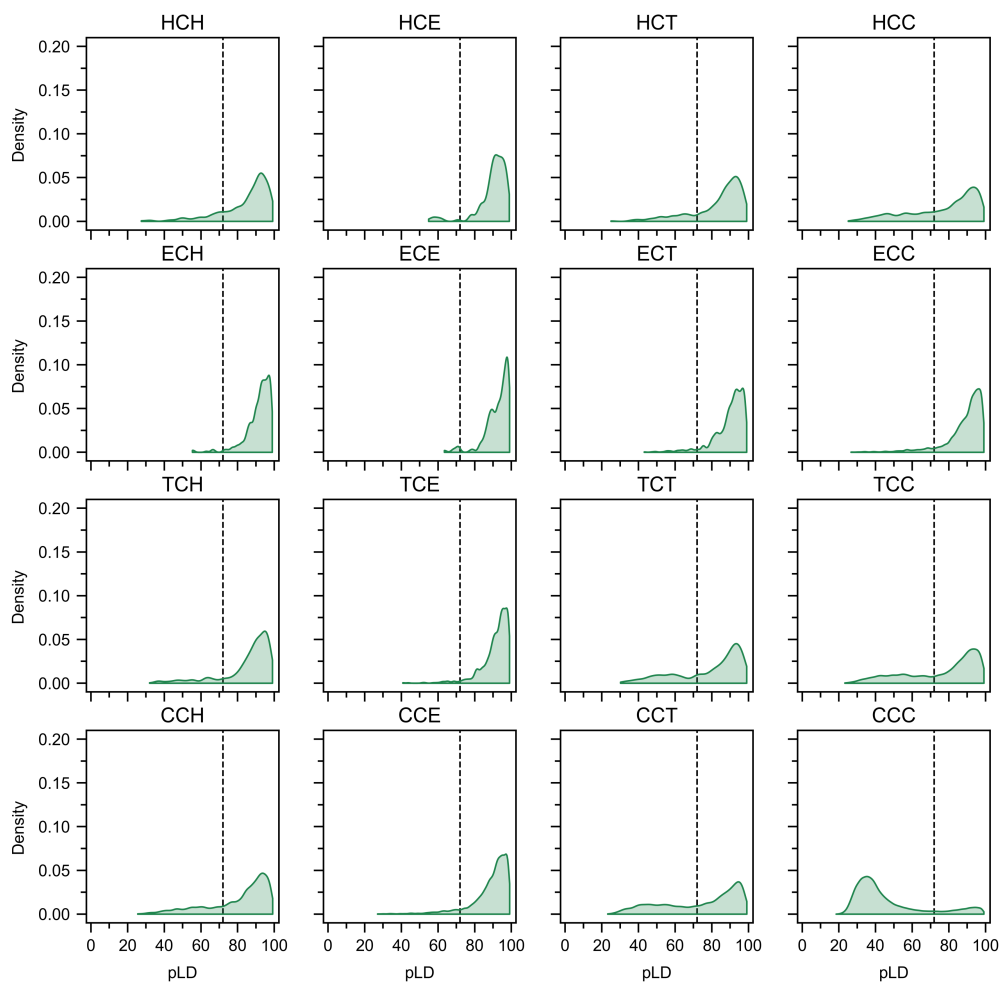

Figure S13: Distributions of pLD values for coil (coil or bend) secondary structure codons (SSC). Bin-widths were set at 0.5, vertical lines indicate  $pLD_{72}$ . pLDDT is abbreviated pLD for plotting purposes.

Table S1: Tabulated performance metrics for pLD-based (tpLD and pLD<sub>n</sub>) and DSSPp predictors on the DisProt-PDB dataset. Abbreviations: Matthews correlation coefficient (MCC); area under ROC curve (AUC); maximum F1-score (F<sub>max</sub>); true positive rate (TPR); false positive rate (FPR); true negative rate (TNR); positive predictive value (PPV); balanced accuracy (BAC); number of proteins covered (COV); predicted Local Distance Difference Test (pLD).

| Pred              | MCC   | AUC   | F <sub>max</sub> | TPR   | FPR   | TNR   | PPV   | BAC   | COV |
|-------------------|-------|-------|------------------|-------|-------|-------|-------|-------|-----|
| DSSPp             | 0.418 | 0.724 | 0.606            | 0.704 | 0.257 | 0.743 | 0.532 | 0.724 | 478 |
| tpLD              | N/A   | 0.905 | 0.784            | N/A   | N/A   | N/A   | N/A   | N/A   | 478 |
| pLD <sub>30</sub> | 0.243 | 0.544 | 0.453            | 0.089 | 0.002 | 0.998 | 0.952 | 0.544 | 478 |
| pLD <sub>32</sub> | 0.308 | 0.569 | 0.453            | 0.141 | 0.003 | 0.997 | 0.948 | 0.569 | 478 |
| pLD <sub>34</sub> | 0.368 | 0.598 | 0.453            | 0.200 | 0.005 | 0.995 | 0.944 | 0.598 | 478 |
| pLD <sub>36</sub> | 0.422 | 0.626 | 0.453            | 0.259 | 0.007 | 0.993 | 0.942 | 0.626 | 478 |
| pLD <sub>38</sub> | 0.469 | 0.654 | 0.474            | 0.317 | 0.009 | 0.991 | 0.937 | 0.654 | 478 |
| pLD <sub>40</sub> | 0.510 | 0.679 | 0.529            | 0.369 | 0.011 | 0.989 | 0.936 | 0.679 | 478 |
| pLD <sub>42</sub> | 0.542 | 0.700 | 0.572            | 0.413 | 0.013 | 0.987 | 0.931 | 0.700 | 478 |
| pLD <sub>44</sub> | 0.566 | 0.717 | 0.605            | 0.450 | 0.015 | 0.985 | 0.926 | 0.717 | 478 |
| pLD <sub>46</sub> | 0.589 | 0.734 | 0.635            | 0.484 | 0.017 | 0.983 | 0.922 | 0.734 | 478 |
| pLD <sub>48</sub> | 0.607 | 0.747 | 0.659            | 0.514 | 0.020 | 0.980 | 0.916 | 0.747 | 478 |
| pLD <sub>50</sub> | 0.623 | 0.760 | 0.679            | 0.542 | 0.022 | 0.978 | 0.910 | 0.760 | 478 |
| pLD <sub>52</sub> | 0.639 | 0.722 | 0.699            | 0.569 | 0.025 | 0.975 | 0.904 | 0.722 | 478 |
| pLD <sub>54</sub> | 0.651 | 0.783 | 0.715            | 0.595 | 0.029 | 0.971 | 0.896 | 0.783 | 478 |
| pLD <sub>56</sub> | 0.664 | 0.794 | 0.731            | 0.621 | 0.032 | 0.968 | 0.889 | 0.794 | 478 |
| pLD <sub>58</sub> | 0.672 | 0.805 | 0.746            | 0.646 | 0.036 | 0.964 | 0.882 | 0.805 | 478 |
| pLD <sub>60</sub> | 0.686 | 0.815 | 0.758            | 0.669 | 0.040 | 0.960 | 0.874 | 0.815 | 478 |
| pLD <sub>62</sub> | 0.692 | 0.822 | 0.766            | 0.688 | 0.045 | 0.955 | 0.864 | 0.822 | 478 |
| pLD <sub>64</sub> | 0.697 | 0.828 | 0.723            | 0.706 | 0.050 | 0.950 | 0.854 | 0.828 | 478 |
| pLD <sub>66</sub> | 0.700 | 0.834 | 0.728            | 0.723 | 0.056 | 0.944 | 0.843 | 0.834 | 478 |
| pLD <sub>68</sub> | 0.701 | 0.838 | 0.782            | 0.738 | 0.062 | 0.938 | 0.830 | 0.838 | 478 |
| pLD <sub>70</sub> | 0.699 | 0.841 | 0.783            | 0.752 | 0.070 | 0.930 | 0.817 | 0.841 | 478 |
| pLD <sub>72</sub> | 0.697 | 0.844 | 0.784            | 0.766 | 0.079 | 0.921 | 0.802 | 0.844 | 478 |
| pLD <sub>74</sub> | 0.693 | 0.846 | 0.783            | 0.780 | 0.088 | 0.912 | 0.786 | 0.846 | 478 |
| pLD <sub>76</sub> | 0.688 | 0.847 | 0.781            | 0.795 | 0.100 | 0.900 | 0.767 | 0.847 | 478 |
| pLD <sub>78</sub> | 0.679 | 0.847 | 0.726            | 0.809 | 0.114 | 0.886 | 0.746 | 0.847 | 478 |
| pLD <sub>80</sub> | 0.667 | 0.846 | 0.769            | 0.823 | 0.132 | 0.868 | 0.721 | 0.846 | 478 |
| pLD <sub>82</sub> | 0.648 | 0.841 | 0.756            | 0.837 | 0.156 | 0.844 | 0.690 | 0.841 | 478 |
| pLD <sub>84</sub> | 0.623 | 0.833 | 0.740            | 0.853 | 0.187 | 0.813 | 0.654 | 0.833 | 478 |
| pLD <sub>86</sub> | 0.591 | 0.820 | 0.718            | 0.871 | 0.230 | 0.720 | 0.611 | 0.820 | 478 |
| pLD <sub>88</sub> | 0.550 | 0.801 | 0.689            | 0.889 | 0.287 | 0.713 | 0.562 | 0.801 | 478 |
| pLD <sub>90</sub> | 0.500 | 0.725 | 0.655            | 0.909 | 0.360 | 0.640 | 0.511 | 0.725 | 478 |

Table S2: Tabulated performance metrics for pLD-based (tpLD and pLD<sub>n</sub>) and DSSPp predictors on the DisProt dataset. Abbreviations: Matthews correlation coefficient (MCC); area under ROC curve (AUC); maximum F1-score (F<sub>max</sub>); true positive rate (TPR); false positive rate (FPR); true negative rate (TNR); positive predictive value (PPV); balanced accuracy (BAC); number of proteins covered (COV); predicted Local Distance Difference Test (pLD).

| Pred              | MCC   | AUC   | F <sub>max</sub> | TPR   | FPR   | TNR   | PPV   | BAC   | COV |
|-------------------|-------|-------|------------------|-------|-------|-------|-------|-------|-----|
| DSSPp             | 0.199 | 0.635 | 0.357            | 0.704 | 0.434 | 0.566 | 0.240 | 0.635 | 478 |
| tpLD              | NA    | 0.731 | 0.429            | N/A   | N/A   | N/A   | N/A   | N/A   | 478 |
| pLD <sub>30</sub> | 0.083 | 0.524 | 0.280            | 0.089 | 0.041 | 0.959 | 0.299 | 0.524 | 478 |
| pLD <sub>32</sub> | 0.105 | 0.538 | 0.280            | 0.141 | 0.065 | 0.935 | 0.296 | 0.538 | 478 |
| pLD <sub>34</sub> | 0.127 | 0.554 | 0.280            | 0.200 | 0.093 | 0.907 | 0.296 | 0.554 | 478 |
| pLD <sub>36</sub> | 0.144 | 0.569 | 0.280            | 0.259 | 0.122 | 0.878 | 0.292 | 0.569 | 478 |
| pLD <sub>38</sub> | 0.160 | 0.583 | 0.303            | 0.317 | 0.151 | 0.849 | 0.290 | 0.583 | 478 |
| pLD <sub>40</sub> | 0.174 | 0.596 | 0.323            | 0.369 | 0.172 | 0.823 | 0.288 | 0.596 | 478 |
| pLD <sub>42</sub> | 0.186 | 0.607 | 0.339            | 0.413 | 0.199 | 0.801 | 0.287 | 0.607 | 478 |
| pLD <sub>44</sub> | 0.197 | 0.616 | 0.350            | 0.450 | 0.217 | 0.783 | 0.287 | 0.616 | 478 |
| pLD <sub>46</sub> | 0.209 | 0.626 | 0.361            | 0.484 | 0.232 | 0.768 | 0.288 | 0.626 | 478 |
| pLD <sub>48</sub> | 0.219 | 0.635 | 0.370            | 0.514 | 0.245 | 0.755 | 0.290 | 0.635 | 478 |
| pLD <sub>50</sub> | 0.229 | 0.643 | 0.379            | 0.542 | 0.256 | 0.744 | 0.291 | 0.643 | 478 |
| pLD <sub>52</sub> | 0.241 | 0.651 | 0.387            | 0.569 | 0.266 | 0.734 | 0.293 | 0.651 | 478 |
| pLD <sub>54</sub> | 0.251 | 0.660 | 0.395            | 0.595 | 0.276 | 0.724 | 0.295 | 0.660 | 478 |
| pLD <sub>56</sub> | 0.262 | 0.668 | 0.402            | 0.621 | 0.285 | 0.715 | 0.298 | 0.668 | 478 |
| pLD <sub>58</sub> | 0.273 | 0.672 | 0.410            | 0.646 | 0.293 | 0.707 | 0.300 | 0.672 | 478 |
| pLD <sub>60</sub> | 0.283 | 0.684 | 0.416            | 0.669 | 0.301 | 0.699 | 0.301 | 0.684 | 478 |
| pLD <sub>62</sub> | 0.290 | 0.690 | 0.420            | 0.688 | 0.309 | 0.691 | 0.302 | 0.690 | 478 |
| pLD <sub>64</sub> | 0.296 | 0.695 | 0.423            | 0.706 | 0.317 | 0.683 | 0.302 | 0.695 | 478 |
| pLD <sub>66</sub> | 0.302 | 0.699 | 0.426            | 0.723 | 0.325 | 0.675 | 0.302 | 0.699 | 478 |
| pLD <sub>68</sub> | 0.305 | 0.703 | 0.428            | 0.738 | 0.333 | 0.667 | 0.301 | 0.703 | 478 |
| pLD <sub>70</sub> | 0.308 | 0.705 | 0.428            | 0.752 | 0.342 | 0.658 | 0.299 | 0.705 | 478 |
| pLD <sub>72</sub> | 0.310 | 0.707 | 0.429            | 0.766 | 0.351 | 0.649 | 0.298 | 0.707 | 478 |
| pLD <sub>74</sub> | 0.312 | 0.709 | 0.428            | 0.780 | 0.362 | 0.638 | 0.295 | 0.709 | 478 |
| pLD <sub>76</sub> | 0.313 | 0.710 | 0.427            | 0.795 | 0.374 | 0.626 | 0.292 | 0.710 | 478 |
| pLD <sub>78</sub> | 0.312 | 0.710 | 0.425            | 0.809 | 0.388 | 0.612 | 0.288 | 0.710 | 478 |
| pLD <sub>80</sub> | 0.310 | 0.709 | 0.422            | 0.823 | 0.405 | 0.595 | 0.283 | 0.709 | 478 |
| pLD <sub>82</sub> | 0.303 | 0.705 | 0.415            | 0.837 | 0.426 | 0.574 | 0.276 | 0.705 | 478 |
| pLD <sub>84</sub> | 0.294 | 0.699 | 0.407            | 0.853 | 0.454 | 0.546 | 0.267 | 0.699 | 478 |
| pLD <sub>86</sub> | 0.282 | 0.690 | 0.396            | 0.871 | 0.490 | 0.510 | 0.256 | 0.690 | 478 |
| pLD <sub>88</sub> | 0.266 | 0.672 | 0.383            | 0.889 | 0.535 | 0.465 | 0.244 | 0.672 | 478 |
| pLD <sub>90</sub> | 0.245 | 0.659 | 0.367            | 0.909 | 0.591 | 0.409 | 0.230 | 0.659 | 478 |

Table S3: Tabulated performance metrics for conventional predictors on the DisProt-PDB dataset. Abbreviations: Matthews correlation coefficient (MCC); area under ROC curve (AUC); maximum F1-score ( $F_{\max}$ ); true postivie rate (TPR); false positive rate (FPR); true negative rate (TNR); positive predictive value (PPV); balanced accuracy (BAC); number of proteins covered (COV).

| Pred            | MCC   | AUC   | $F_{\max}$ | TPR   | FPR   | TNR   | PPV   | BAC   | COV |
|-----------------|-------|-------|------------|-------|-------|-------|-------|-------|-----|
| AUCpreD         | 0.673 | 0.909 | 0.768      | 0.709 | 0.065 | 0.935 | 0.818 | 0.822 | 475 |
| AUCpreD-np      | 0.610 | 0.886 | 0.731      | 0.589 | 0.047 | 0.953 | 0.838 | 0.721 | 475 |
| DisoMine        | 0.509 | 0.858 | 0.688      | 0.569 | 0.095 | 0.905 | 0.712 | 0.737 | 475 |
| ESpritz-D       | 0.397 | 0.854 | 0.679      | 0.333 | 0.042 | 0.958 | 0.765 | 0.645 | 475 |
| fIDPnn          | 0.390 | 0.866 | 0.689      | 0.253 | 0.015 | 0.985 | 0.876 | 0.619 | 475 |
| fIDPlr          | 0.484 | 0.851 | 0.666      | 0.467 | 0.059 | 0.941 | 0.765 | 0.704 | 475 |
| Predisorder     | 0.557 | 0.876 | 0.723      | 0.805 | 0.210 | 0.709 | 0.614 | 0.798 | 475 |
| RawMSA          | 0.614 | 0.895 | 0.746      | 0.659 | 0.072 | 0.923 | 0.781 | 0.791 | 474 |
| SPOT-Disorder1  | 0.692 | 0.917 | 0.783      | 0.752 | 0.074 | 0.926 | 0.807 | 0.839 | 475 |
| SPOT-Disorder-S | 0.618 | 0.896 | 0.744      | 0.565 | 0.033 | 0.967 | 0.875 | 0.766 | 475 |
| SPOT-Disorder2  | 0.698 | 0.917 | 0.780      | 0.760 | 0.073 | 0.927 | 0.801 | 0.843 | 451 |

Table S4: Tabulated performance metrics for conventional predictors on the DisProt dataset. Abbreviations: Matthews correlation coefficient (MCC); area under ROC curve (AUC); maximum F1-score ( $F_{\max}$ ); true postivie rate (TPR); false positive rate (FPR); true negative rate (TNR); positive predictive value (PPV); balanced accuracy (BAC); number of proteins covered (COV).

| Pred            | MCC   | AUC   | $F_{\max}$ | TPR   | FPR   | TNR   | PPV   | BAC   | COV |
|-----------------|-------|-------|------------|-------|-------|-------|-------|-------|-----|
| AUCpreD         | 0.311 | 0.760 | 0.434      | 0.709 | 0.302 | 0.698 | 0.313 | 0.703 | 475 |
| AUCpreD-np      | 0.299 | 0.758 | 0.434      | 0.589 | 0.224 | 0.726 | 0.338 | 0.682 | 475 |
| DisoMine        | 0.274 | 0.763 | 0.426      | 0.569 | 0.233 | 0.767 | 0.321 | 0.668 | 475 |
| ESpritz-D       | 0.268 | 0.767 | 0.427      | 0.333 | 0.090 | 0.910 | 0.419 | 0.622 | 475 |
| fIDPnn          | 0.284 | 0.794 | 0.457      | 0.253 | 0.045 | 0.955 | 0.521 | 0.604 | 475 |
| fIDPlr          | 0.287 | 0.720 | 0.424      | 0.467 | 0.153 | 0.847 | 0.372 | 0.657 | 475 |
| Predisorder     | 0.280 | 0.744 | 0.423      | 0.805 | 0.426 | 0.574 | 0.268 | 0.690 | 475 |
| RawMSA          | 0.306 | 0.725 | 0.439      | 0.657 | 0.269 | 0.731 | 0.322 | 0.696 | 474 |
| SPOT-Disorder1  | 0.317 | 0.749 | 0.437      | 0.752 | 0.331 | 0.669 | 0.306 | 0.711 | 475 |
| SPOT-Disorder-S | 0.282 | 0.760 | 0.431      | 0.565 | 0.222 | 0.728 | 0.330 | 0.672 | 475 |
| SPOT-Disorder2  | 0.329 | 0.755 | 0.448      | 0.437 | 0.391 | 0.609 | 0.191 | 0.716 | 451 |



## References

- (1) Fawcett, T. An introduction to ROC analysis. *Pattern Recognit. Lett.* **2006**, *27*, 861–874.
- (2) Rijsbergen, C. J. *Information retrieval*; Butterworth-Heinemann: Oxford, United Kingdom, 1979.
- (3) Radivojac, P.; Clark, W. T.; Oron, T. R.; Schnoes, A. M.; Wittkop, T.; Sokolov, A.; Graim, K.; Funk, C.; Verspoor, K.; Ben-Hur, A.; Pandey, G.; Yunes, J. M.; Talwalkar, A. S.; Repo, S.; Souza, M. L.; Piovesan, D.; Casadio, R.; Wang, Z.; Cheng, J.; Fang, H.; Gough, J.; Koskinen, P.; Törönen, P.; Nokso-Koivisto, J.; Holm, L.; Cozzetto, D.; Buchan, D. W. A.; Bryson, K.; Jones, D. T.; Limaye, B.; Inamdar, H.; Datta, A.; Manjari, S. K.; Joshi, R.; Chitale, M.; Kihara, D.; Lisewski, A. M.; Erdin, S.; Venner, E.; Lichtarge, O.; Rentzsch, R.; Yang, H.; Romero, A. E.; Bhat, P.; Paccanaro, A.; Hamp, T.; Kaßner, R.; Seemayer, S.; Vicedo, E.; Schaefer, C.; Achten, D.; Auer, F.; Boehm, A.; Braun, T.; Hecht, M.; Heron, M.; Hönigsmid, P.; Hopf, T. A.; Kaufmann, S.; Kiening, M.; Krompass, D.; Landerer, C.; Mahlich, Y.; Roos, M.; Björne, J.; Salakoski, T.; Wong, A.; Shatkay, H.; Gatzmann, F.; Sommer, I.; Wass, M. N.; Sternberg, M. J. E.; Škunca, N.; Supek, F.; Bošnjak, M.; Panov, P.; Džeroski, S.; Šmuc, T.; Kourmpetis, Y. A. I.; van Dijk, A. D. J.; ter Braak, C. J. F.; Zhou, Y.; Gong, Q.; Dong, X.; Tian, W.; Falda, M.; Fontana, P.; Lavezzo, E.; Camillo, B. D.; Toppo, S.; Lan, L.; Djuric, N.; Guo, Y.; Vucetic, S.; Bairoch, A.; Linial, M.; Babbitt, P. C.; Brenner, S. E.; Orengo, C.; Rost, B.; Mooney, S. D.; Friedberg, I. A large-scale evaluation of computational protein function prediction. *Nat. Methods* **2013**, *10*, 221–227.
- (4) Matthews, B. W. Comparison of the predicted and observed secondary structure of T4 phage lysozyme. *Biochim. Biophys. Acta* **1975**, *405*, 442–451.
- (5) Chicco, D.; Jurman, G. The advantages of the Matthews correlation coefficient (MCC)

over F1 score and accuracy in binary classification evaluation. *BMC Genomics* **2020**, *21*.
